# Supplementary material for: A {BW12O40} hybrid decorated by Ag+ for use as a supercapacitor electrode material and photocatalyst
Source: Royal Society of Chemistry journal article supplement (doi:10.1039/d1nj02845f), 2021-01-01
Supplement: d1nj02845f2.pdf [file d1nj02845f2.pdf]

## Supporting Information

### {BW<sub>12</sub>O<sub>40</sub>} Hybrid decorated by Ag<sup>+</sup> for using as the material of Supercapacitor and Photocatalyst

Qiu-Lan Liang<sup>a</sup>, Na-Na Du<sup>a</sup>, Li-Ge Gong<sup>a,b\*</sup>, Chun-Xiao Wang<sup>a</sup>, Chun-Mei Wang<sup>a</sup>, Kai Yu<sup>a,b\*</sup>, Bai-Bin Zhou<sup>a,b\*</sup>

**Materials and General Characterization.** All reagents are purchased without further purification. The infrared spectroscopy (IR) of the compound is carried out on a VER TEX 80 infrared Raman spectrometer from the Bruker Germany, adopting KBr pellets in the range 4000-400 cm<sup>-1</sup>. X-ray powder diffraction (XRPD) were conducted by a Bruker D8 ADVANCE instrument using Cu-K $\alpha$  radiation ( $\lambda = 1.54056 \text{ \AA}$ ) at room temperature. Scanning electron microscope (SEM) was performed on Hitachi SU-70. The content analysis of C, H, and N were tested by the American Flash EA1112 CHN elemental analyzer, and B, W, and Ag were tested by the US 7500CX inductively coupled plasma mass spectrometer. The Diamond 6300 differential thermal analyzer from Perkin-Elmer company in the United States is used, with  $\alpha$ -Al<sub>2</sub>O<sub>3</sub> as the reference, platinum crucible, heating rate is 10 °C min<sup>-1</sup>, static air atmosphere.

**X-ray crystallography.** The compound was fastened to the glass filament for collecting the diffraction data at 296(2) Bruker SMART CCD detector with graphite monochromatic MoK $\alpha$  radiation ( $\lambda = 0.71073 \text{ \AA}$ ). Crystal structure of compound is determined by direct methods and refined by means of full-matrix least-squares on F<sup>2</sup> (Table S3). Selected bond lengths (Å) and angles were listed in Table S4.

**electrochemical characterization for Supercapacitor.** The electrochemical performance of the prepared electrode materials were carried out on the CHI660E electrochemical workstation by using a three-electrode system in 1 M H<sub>2</sub>SO<sub>4</sub> solution. A Pt plate and the Ag/AgCl (3M KCl) electrode were used as the counter electrode and reference electrode, respectively. The as-prepared glassy carbon electrode was employed as the working electrode. The main methods used are cyclic voltammetry, galvanostatic charge-discharge measurement and electrochemical impedance spectroscopy.

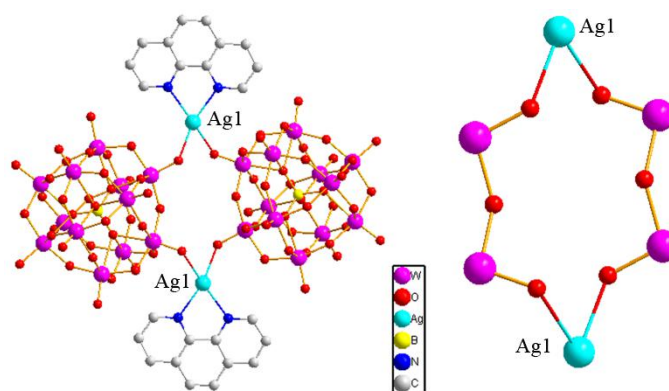

**Fig. S1** The twelve-membered ring view of compound.

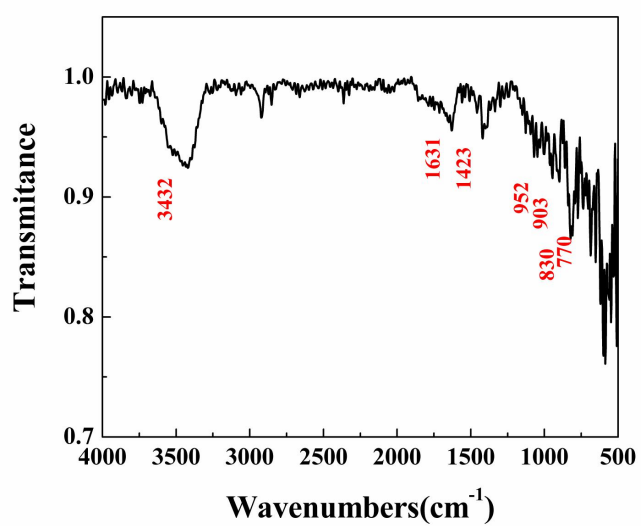

**Fig. S2** IR spectra of compound.

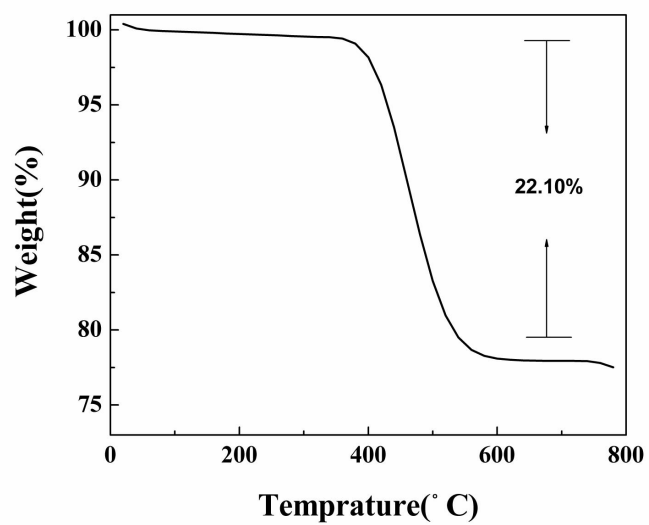

**Fig. S3** TG curve of compound.

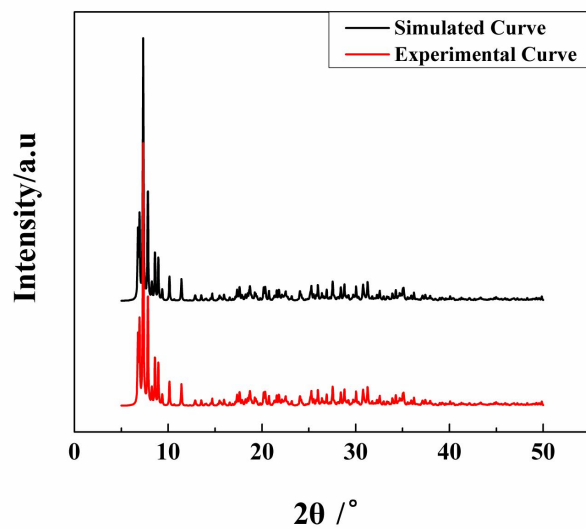

**Fig. S4** XRD spectra of compound.

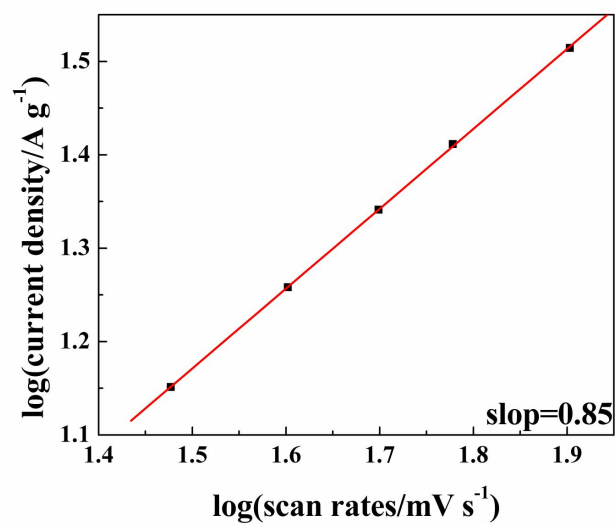

**Fig. S5** The plot of log of current density vs. the log of scan rate in the scan rate range of 30-80  $\text{mV s}^{-1}$  for 1-GCE.

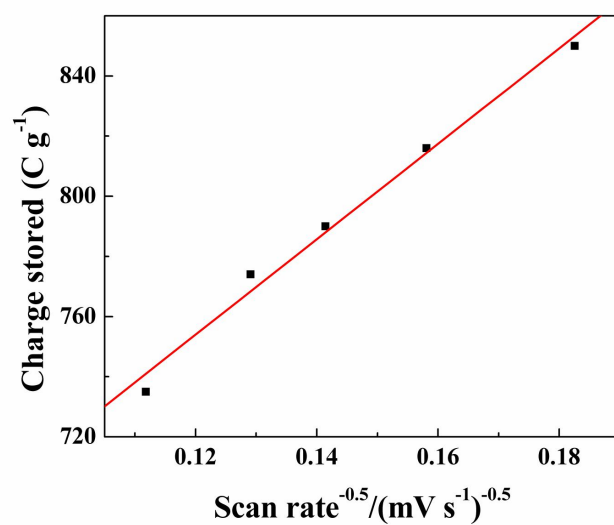

**Fig. S6** The plot of the total charge stored( $q$ ) vs. the reciprocal of the square root of the scan rate for 1-GCE.

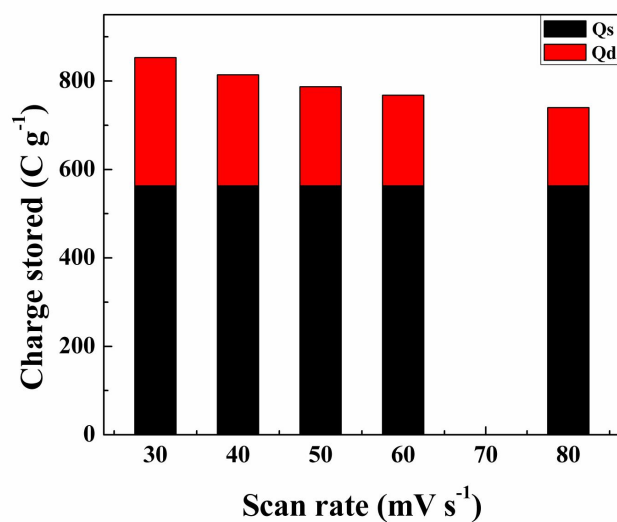

**Fig. S7** illustration of the contribution from the capacitive( $Q_s$ ) and diffusion-controlled( $Q_d$ ) charge to the total charge stored at different scan rates for 1-GCE.

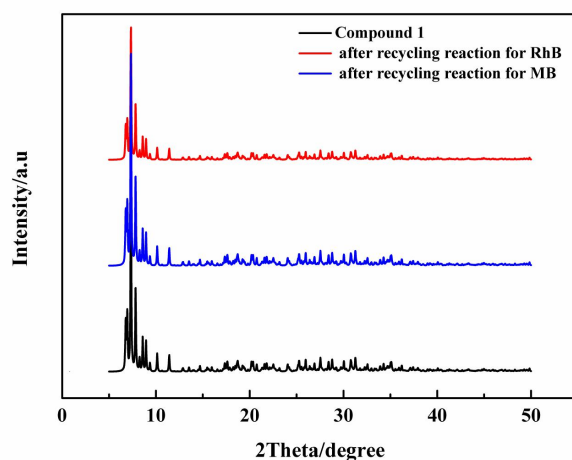

**Fig. S8** XRD patterns before and after recycling reactions.

**Table S1** Crystal data and structure refinement data for **1**

| Compound                                                              | <b>1</b>                                                                                                        |
|-----------------------------------------------------------------------|-----------------------------------------------------------------------------------------------------------------|
| Chemical formula                                                      | C <sub>120</sub> H <sub>80</sub> Ag <sub>6</sub> B <sub>2</sub> N <sub>20</sub> O <sub>80</sub> W <sub>24</sub> |
| Formula weight                                                        | 8163.05                                                                                                         |
| T/K                                                                   | 296(2)                                                                                                          |
| Crystal system                                                        | Triclinic                                                                                                       |
| Space group                                                           | P-1                                                                                                             |
| a/Å                                                                   | 14.3019(10)                                                                                                     |
| b/Å                                                                   | 14.9420(11)                                                                                                     |
| c/Å                                                                   | 21.4307(15)                                                                                                     |
| α/°                                                                   | 74.0570(10)                                                                                                     |
| β/°                                                                   | 86.3790(10)                                                                                                     |
| γ/°                                                                   | 65.4190(10)                                                                                                     |
| V/Å <sup>3</sup>                                                      | 3997.6(5)                                                                                                       |
| Z                                                                     | 1                                                                                                               |
| Dcalc/Mg m <sup>-3</sup>                                              | 3.391                                                                                                           |
| μ/mm <sup>-1</sup>                                                    | 17.996                                                                                                          |
| F(000)                                                                | 3648.0                                                                                                          |
| θ range/°                                                             | 2.335-28.332                                                                                                    |
| Reflections                                                           | 38592/19323                                                                                                     |
| collected/ unique                                                     | [R(int) = 0.0331]                                                                                               |
| Data/restraints/paramtrs                                              | 19323/12/1135                                                                                                   |
| GOF on F <sup>2</sup>                                                 | 1.022                                                                                                           |
| R <sub>1</sub> <sup>a</sup> /wR <sub>2</sub> [I > 2σ(I)] <sup>b</sup> | 0.0415/0.1248                                                                                                   |
| Δρfin (max/min), e Å <sup>-3</sup>                                    | 3.396/-7.023                                                                                                    |

$${}^a R_1 = \sum ||F_0| - |F_c|| / \sum |F_0| \cdot {}^b wR_2 = \sum [w(F_0^2 - F_c^2)^2] / \sum [w(F_0^2)^2]^{1/2}.$$

**Table S2** Selected bond lengths (Å) and bond angles (°) of **1**

|            |           |              |           |            |           |
|------------|-----------|--------------|-----------|------------|-----------|
| B(1)-O(9)  | 1.528(11) | B(1)-O(11)#1 | 1.528(12) | B(1)-O(12) | 1.544(11) |
| B(1)-O(14) | 1.517(12) | W(1)-O(1)    | 1.926(7)  | W(1)-O(3)  | 1.904(7)  |
| W(1)-O(12) | 2.367(6)  | W(1)-O(15)   | 1.877(7)  | W(1)-O(25) | 1.710(8)  |

|                  |           |                  |           |                  |           |
|------------------|-----------|------------------|-----------|------------------|-----------|
| W(1)-O(31)       | 1.927(7)  | W(2)-O(1)        | 1.932(7)  | W(2)-O(2)        | 1.884(7)  |
| W(2)-O(4)        | 1.871(7)  | W(2)-O(6)        | 1.757(7)  | W(2)-O(8)        | 1.919(7)  |
| W(2)-O(12)       | 2.285(7)  | W(3)-O(8)        | 1.916(8)  | W(3)-O(10)       | 1.914(7)  |
| W(3)-O(12)       | 2.392(7)  | W(3)-O(23)       | 1.893(7)  | W(3)-O(31)       | 1.905(7)  |
| W(3)-O(32)       | 1.704(7)  | W(4)-O(14)       | 2.354(7)  | W(4)-O(16)       | 1.910(7)  |
| W(4)-O(23)       | 1.908(7)  | W(4)-O(26)       | 1.906(8)  | W(4)-O(29)       | 1.910(8)  |
| W(4)-O(39)       | 1.709(9)  | W(5)-O(3)        | 1.897(7)  | W(5)-O(7)        | 1.728(8)  |
| W(5)-O(11)       | 2.353(7)  | W(5)-O(22)       | 1.887(8)  | W(5)-O(24)       | 1.902(8)  |
| W(5)-O(40)       | 1.921(7)  | W(6)-O(2)        | 1.933(7)  | W(6)-O(9)        | 2.381(7)  |
| W(6)-O(19)       | 1.904(7)  | W(6)-O(20)       | 1.907(8)  | W(6)-O(30)       | 1.708(8)  |
| W(6)-O(33)       | 1.901(7)  | W(7)-O(5)        | 1.903(7)  | W(7)-O(9)        | 2.395(6)  |
| W(7)-O(17)       | 1.919(7)  | W(7)-O(21)       | 1.900(7)  | W(7)-O(33)       | 1.928(8)  |
| W(7)-O(34)       | 1.713(7)  | W(8)-O(5)        | 1.895(7)  | W(8)-O(11)       | 2.389(6)  |
| W(8)-O(13)       | 1.880(8)  | W(8)-O(18)       | 1.931(8)  | W(8)-O(28)       | 1.725(8)  |
| W(8)-O(40)       | 1.912(7)  | W(9)-O(4)        | 1.922(7)  | W(9)-O(11)       | 2.348(7)  |
| W(9)-O(18)       | 1.898(7)  | W(9)-O(19)       | 1.894(7)  | W(9)-O(24)       | 1.922(7)  |
| W(9)-O(35)       | 1.707(8)  | W(10)-O(14)      | 2.376(7)  | W(10)-O(15)      | 1.906(7)  |
| W(10)-O(22)      | 1.903(8)  | W(10)-O(26)      | 1.917(8)  | W(10)-O(27)      | 1.916(7)  |
| W(10)-O(36)      | 1.706(8)  | W(11)-O(9)       | 2.316(6)  | W(11)-O(10)      | 1.874(7)  |
| W(11)-O(17)      | 1.916(7)  | W(11)-O(20)      | 1.931(8)  | W(11)-O(29)      | 1.881(8)  |
| W(11)-O(37)      | 1.749(8)  | W(12)-O(13)      | 1.911(8)  | W(12)-O(14)      | 2.393(7)  |
| W(12)-O(16)      | 1.905(8)  | W(12)-O(21)      | 1.889(7)  | W(12)-O(27)      | 1.916(7)  |
| W(12)-O(38)      | 1.713(8)  | Ag(1)-N(8)       | 2.357(11) | Ag(1)-N(10)      | 2.326(11) |
| Ag(2)-N(2)       | 1.997(10) | Ag(2)-N(3)       | 2.032(9)  | Ag(2)-N(5)       | 2.014(9)  |
| Ag(2)-N(7)       | 1.987(10) | Ag(3)-N(1)       | 1.970(9)  | Ag(3)-N(4)       | 1.963(9)  |
| Ag(3)-N(6)       | 2.154(10) | Ag(3)-N(9)       | 2.043(10) | Ag(1)-O(7)       | 2.298(8)  |
| Ag(1)-O(25)      | 2.638     | Ag(2)-O(37)      | 2.136(8)  | Ag(3)-O(6)       | 2.077(8)  |
| O(1)-W(1)-O(12)  | 74.9(3)   | O(1)-W(1)-O(31)  | 88.3(3)   | O(3)-W(1)-O(1)   | 89.9(3)   |
| O(3)-W(1)-O(12)  | 85.9(3)   | O(3)-W(1)-O(31)  | 161.4(3)  | O(15)-W(1)-O(1)  | 161.1(3)  |
| O(15)-W(1)-O(3)  | 86.8(3)   | O(15)-W(1)-O(12) | 86.3(3)   | O(15)-W(1)-O(31) | 89.0(3)   |
| O(25)-W(1)-O(1)  | 97.6(4)   | O(25)-W(1)-O(3)  | 101.8(3)  | O(25)-W(1)-O(12) | 169.4(3)  |
| O(25)-W(1)-O(15) | 101.3(4)  | O(25)-W(1)-O(31) | 96.9(3)   | O(31)-W(1)-O(12) | 75.7(3)   |
| O(1)-W(2)-O(12)  | 76.8(3)   | O(2)-W(2)-O(1)   | 164.7(3)  | O(2)-W(2)-O(8)   | 88.9(3)   |
| O(2)-W(2)-O(12)  | 87.9(3)   | O(4)-W(2)-O(1)   | 89.9(3)   | O(4)-W(2)-O(2)   | 88.4(3)   |
| O(4)-W(2)-O(8)   | 161.4(3)  | O(4)-W(2)-O(12)  | 85.2(3)   | O(6)-W(2)-O(1)   | 92.8(3)   |
| O(6)-W(2)-O(2)   | 102.5(3)  | O(6)-W(2)-O(4)   | 99.2(3)   | O(6)-W(2)-O(8)   | 99.3(3)   |
| O(6)-W(2)-O(12)  | 168.8(3)  | O(8)-W(2)-O(1)   | 87.9(3)   | O(8)-W(2)-O(12)  | 76.3(3)   |
| O(8)-W(3)-O(12)  | 73.8(3)   | O(10)-W(3)-O(8)  | 88.4(3)   | O(10)-W(3)-O(12) | 84.2(3)   |
| O(23)-W(3)-O(8)  | 159.3(3)  | O(23)-W(3)-O(10) | 85.9(3)   | O(23)-W(3)-O(12) | 85.9(3)   |
| O(23)-W(3)-O(31) | 89.1(3)   | O(31)-W(3)-O(8)  | 89.4(3)   | O(31)-W(3)-O(10) | 159.4(3)  |
| O(31)-W(3)-O(12) | 75.5(3)   | O(32)-W(3)-O(8)  | 98.9(4)   | O(32)-W(3)-O(10) | 101.1(3)  |
| O(32)-W(3)-O(12) | 170.9(3)  | O(32)-W(3)-O(23) | 101.8(4)  | O(32)-W(3)-O(31) | 99.5(3)   |
| O(16)-W(4)-O(14) | 76.2(3)   | O(23)-W(4)-O(14) | 85.1(3)   | O(23)-W(4)-O(16) | 160.9(3)  |
| O(23)-W(4)-O(29) | 85.7(3)   | O(26)-W(4)-O(14) | 76.4(3)   | O(26)-W(4)-O(16) | 88.4(3)   |
| O(26)-W(4)-O(23) | 91.1(3)   | O(26)-W(4)-O(29) | 160.8(3)  | O(29)-W(4)-O(14) | 84.5(3)   |

|                   |          |                   |          |                   |          |
|-------------------|----------|-------------------|----------|-------------------|----------|
| O(29)-W(4)-O(16)  | 88.5(3)  | O(39)-W(4)-O(14)  | 173.2(3) | O(39)-W(4)-O(16)  | 98.2(4)  |
| O(39)-W(4)-O(23)  | 100.7(4) | O(39)-W(4)-O(26)  | 99.8(4)  | O(39)-W(4)-O(29)  | 99.3(4)  |
| O(3)-W(5)-O(11)   | 86.8(3)  | O(3)-W(5)-O(24)   | 90.7(3)  | O(3)-W(5)-O(40)   | 162.0(3) |
| O(7)-W(5)-O(3)    | 101.9(3) | O(7)-W(5)-O(11)   | 170.5(3) | O(7)-W(5)-O(22)   | 99.1(4)  |
| O(7)-W(5)-O(24)   | 100.2(4) | O(7)-W(5)-O(40)   | 96.0(3)  | O(22)-W(5)-O(3)   | 86.4(3)  |
| O(22)-W(5)-O(11)  | 85.1(3)  | O(22)-W(5)-O(24)  | 160.6(3) | O(22)-W(5)-O(40)  | 89.0(3)  |
| O(24)-W(5)-O(11)  | 75.6(3)  | O(24)-W(5)-O(40)  | 87.9(3)  | O(40)-W(5)-O(11)  | 75.4(3)  |
| O(2)-W(6)-O(9)    | 84.8(3)  | O(19)-W(6)-O(2)   | 85.3(3)  | O(19)-W(6)-O(9)   | 84.8(3)  |
| O(19)-W(6)-O(20)  | 159.4(3) | O(20)-W(6)-O(2)   | 89.2(3)  | O(20)-W(6)-O(9)   | 74.9(3)  |
| O(30)-W(6)-O(2)   | 98.8(3)  | O(30)-W(6)-O(9)   | 173.3(3) | O(30)-W(6)-O(19)  | 101.1(4) |
| O(30)-W(6)-O(20)  | 99.4(4)  | O(30)-W(6)-O(33)  | 100.7(4) | O(33)-W(6)-O(2)   | 160.5(3) |
| O(33)-W(6)-O(9)   | 76.1(3)  | O(33)-W(6)-O(19)  | 89.1(3)  | O(33)-W(6)-O(20)  | 89.4(3)  |
| O(5)-W(7)-O(9)    | 85.6(3)  | O(5)-W(7)-O(17)   | 160.2(3) | O(5)-W(7)-O(33)   | 88.9(3)  |
| O(17)-W(7)-O(9)   | 74.7(3)  | O(17)-W(7)-O(33)  | 87.9(3)  | O(21)-W(7)-O(5)   | 86.5(3)  |
| O(21)-W(7)-O(9)   | 84.3(3)  | O(21)-W(7)-O(17)  | 89.6(3)  | O(21)-W(7)-O(33)  | 159.3(3) |
| O(33)-W(7)-O(9)   | 75.2(3)  | O(34)-W(7)-O(5)   | 100.2(3) | O(34)-W(7)-O(9)   | 172.3(3) |
| O(34)-W(7)-O(17)  | 99.5(4)  | O(34)-W(7)-O(21)  | 101.0(4) | O(34)-W(7)-O(33)  | 99.6(4)  |
| O(5)-W(8)-O(11)   | 84.6(3)  | O(5)-W(8)-O(18)   | 87.3(3)  | O(5)-W(8)-O(40)   | 159.3(3) |
| O(13)-W(8)-O(5)   | 88.4(3)  | O(13)-W(8)-O(11)  | 85.5(3)  | O(13)-W(8)-O(18)  | 160.2(3) |
| O(13)-W(8)-O(40)  | 89.5(3)  | O(18)-W(8)-O(11)  | 74.8(3)  | O(28)-W(8)-O(5)   | 100.8(4) |
| O(28)-W(8)-O(11)  | 171.9(3) | O(28)-W(8)-O(13)  | 100.6(4) | O(28)-W(8)-O(18)  | 99.2(4)  |
| O(28)-W(8)-O(40)  | 99.8(4)  | O(40)-W(8)-O(11)  | 74.7(3)  | O(40)-W(8)-O(18)  | 87.7(3)  |
| O(4)-W(9)-O(11)   | 83.3(3)  | O(4)-W(9)-O(24)   | 87.2(3)  | O(18)-W(9)-O(4)   | 159.7(3) |
| O(18)-W(9)-O(11)  | 76.4(3)  | O(18)-W(9)-O(24)  | 89.2(3)  | O(19)-W(9)-O(4)   | 86.0(3)  |
| O(19)-W(9)-O(11)  | 86.2(3)  | O(19)-W(9)-O(18)  | 91.1(3)  | O(19)-W(9)-O(24)  | 161.0(3) |
| O(24)-W(9)-O(11)  | 75.4(3)  | O(35)-W(9)-O(4)   | 100.1(4) | O(35)-W(9)-O(11)  | 173.4(3) |
| O(35)-W(9)-O(18)  | 100.2(4) | O(35)-W(9)-O(19)  | 99.6(4)  | O(35)-W(9)-O(24)  | 99.1(4)  |
| O(15)-W(10)-O(14) | 84.1(3)  | O(15)-W(10)-O(26) | 89.3(3)  | O(15)-W(10)-O(27) | 159.8(3) |
| O(22)-W(10)-O(14) | 84.3(3)  | O(22)-W(10)-O(15) | 86.7(3)  | O(22)-W(10)-O(26) | 159.8(3) |
| O(22)-W(10)-O(27) | 88.9(3)  | O(26)-W(10)-O(14) | 75.6(3)  | O(27)-W(10)-O(14) | 75.9(3)  |
| O(27)-W(10)-O(26) | 88.1(3)  | O(36)-W(10)-O(14) | 173.5(3) | O(36)-W(10)-O(15) | 100.7(4) |
| O(36)-W(10)-O(22) | 100.3(4) | O(36)-W(10)-O(26) | 99.8(4)  | O(36)-W(10)-O(27) | 99.5(4)  |
| O(10)-W(11)-O(9)  | 85.9(3)  | O(10)-W(11)-O(17) | 162.6(3) | O(10)-W(11)-O(20) | 88.7(3)  |
| O(10)-W(11)-O(29) | 88.5(3)  | O(17)-W(11)-O(9)  | 76.8(3)  | O(17)-W(11)-O(20) | 87.6(3)  |
| O(20)-W(11)-O(9)  | 76.1(3)  | O(29)-W(11)-O(9)  | 86.6(3)  | O(29)-W(11)-O(17) | 90.0(3)  |
| O(29)-W(11)-O(20) | 162.7(3) | O(37)-W(11)-O(9)  | 172.5(3) | O(37)-W(11)-O(10) | 98.5(3)  |
| O(37)-W(11)-O(17) | 98.8(3)  | O(37)-W(11)-O(20) | 97.9(3)  | O(37)-W(11)-O(29) | 99.5(4)  |
| O(13)-W(12)-O(14) | 85.6(3)  | O(13)-W(12)-O(27) | 88.8(3)  | O(16)-W(12)-O(13) | 160.8(3) |
| O(16)-W(12)-O(14) | 75.3(3)  | O(16)-W(12)-O(27) | 88.2(3)  | O(21)-W(12)-O(13) | 86.1(3)  |
| O(21)-W(12)-O(14) | 84.3(3)  | O(21)-W(12)-O(16) | 90.1(3)  | O(21)-W(12)-O(27) | 159.4(3) |
| O(27)-W(12)-O(14) | 75.4(3)  | O(38)-W(12)-O(13) | 100.7(4) | O(38)-W(12)-O(14) | 172.5(3) |
| O(38)-W(12)-O(16) | 98.5(4)  | O(38)-W(12)-O(21) | 100.0(4) | O(38)-W(12)-O(27) | 100.5(4) |
| N(10)-Ag(1)-N(8)  | 71.5(4)  | N(2)-Ag(2)-N(3)   | 82.5(4)  | N(2)-Ag(2)-N(5)   | 99.8(4)  |
| N(5)-Ag(2)-N(3)   | 141.4(4) | N(7)-Ag(2)-N(2)   | 171.3(4) | N(7)-Ag(2)-N(3)   | 101.7(4) |
| N(7)-Ag(2)-N(5)   | 81.8(4)  | N(1)-Ag(3)-N(6)   | 81.1(4)  | N(1)-Ag(3)-N(9)   | 93.2(4)  |

|                  |          |                   |          |                  |          |
|------------------|----------|-------------------|----------|------------------|----------|
| N(4)-Ag(3)-N(1)  | 174.8(4) | N(4)-Ag(3)-N(6)   | 98.2(4)  | N(4)-Ag(3)-N(9)  | 82.0(4)  |
| N(9)-Ag(3)-N(6)  | 104.1(4) | N(8)-Ag(1)-O(7)   | 121.6(3) | N(10)-Ag(1)-O(7) | 156.2(3) |
| N(8)-Ag(1)-O(25) | 146.4    | N(10)-Ag(1)-O(25) | 109.6    | N(2)-Ag(2)-O(37) | 84.5(3)  |
| N(3)-Ag(2)-O(37) | 93.6(3)  | N(5)-Ag(2)-O(37)  | 125.0(4) | N(7)-Ag(2)-O(37) | 87.5(4)  |
| N(1)-Ag(3)-O(6)  | 94.1(3)  | N(4)-Ag(3)-O(6)   | 91.1(4)  | N(6)-Ag(3)-O(6)  | 104.4(4) |
| N(9)-Ag(3)-O(6)  | 151.3(4) | O(7)-Ag(1)-O(25)  | 71.4     |                  |          |

Symmetry transformations used to generate equivalent atoms: #1 -x,-y,-z; #2 -x+1/2,-y+1/2,-z

**Table S3** Keggin-based electrode materials

|    | Electrode material                                                                                                                                                                          | Electrolyte                          | Scan rate / Current density | Specific capacitance    | Ref.             |
|----|---------------------------------------------------------------------------------------------------------------------------------------------------------------------------------------------|--------------------------------------|-----------------------------|-------------------------|------------------|
| 1  | Compound 1                                                                                                                                                                                  | 1 M H <sub>2</sub> SO <sub>4</sub>   | 2.16 A g <sup>-1</sup>      | 1647 F g <sup>-1</sup>  | <b>This work</b> |
| 2  | NENU-5/PPy /60                                                                                                                                                                              | 1 M H <sub>2</sub> SO <sub>4</sub>   | 2 mA cm <sup>-2</sup>       | 508.6 F g <sup>-1</sup> | 1                |
| 3  | [PW <sub>11</sub> CuO <sub>39</sub> ] <sup>5-</sup> @Ru-rGO                                                                                                                                 | 0.5 M HOAC                           | 0.2 A g <sup>-1</sup>       | 705 F g <sup>-1</sup>   | 2                |
| 4  | [Ag <sub>5</sub> (brtmb) <sub>4</sub> ][VW <sub>10</sub> V <sub>2</sub> O <sub>40</sub> ]                                                                                                   | 1 M H <sub>2</sub> SO <sub>4</sub>   | 110 A g <sup>-1</sup>       | 206 F g <sup>-1</sup>   | 3                |
| 5  | (PMo <sub>12</sub> /PANI/TiN NWA)                                                                                                                                                           | 1 M H <sub>2</sub> SO <sub>4</sub>   | 1 A g <sup>-1</sup>         | 469 F g <sup>-1</sup>   | 4                |
| 6  | [H(C <sub>10</sub> H <sub>10</sub> N <sub>2</sub> )Cu <sub>2</sub> ][PMo <sub>12</sub> O <sub>40</sub> ]                                                                                    | 0.5 M H <sub>2</sub> SO <sub>4</sub> | 1 A g <sup>-1</sup>         | 287 F g <sup>-1</sup>   | 5                |
| 7  | [H(C <sub>10</sub> H <sub>10</sub> N <sub>2</sub> )Cu <sub>2</sub> ][PW <sub>12</sub> O <sub>40</sub> ]                                                                                     | 0.5 M H <sub>2</sub> SO <sub>4</sub> | 1 A g <sup>-1</sup>         | 153.4 F g <sup>-1</sup> | 5                |
| 8  | [Cu <sup>I</sup> H <sub>2</sub> (C <sub>12</sub> H <sub>12</sub> N <sub>6</sub> )(PMo <sub>12</sub> O <sub>40</sub> )]·[(C <sub>6</sub> H <sub>15</sub> N)(H <sub>2</sub> O) <sub>2</sub> ] | 1 M H <sub>2</sub> SO <sub>4</sub>   | 3 A g <sup>-1</sup>         | 249 F g <sup>-1</sup>   | 6                |
| 9  | HPW/rGO                                                                                                                                                                                     | 5 M H <sub>2</sub> SO <sub>4</sub>   | 5 mV s <sup>-1</sup>        | 337.5 F g <sup>-1</sup> | 7                |
| 10 | PAni/H <sub>3</sub> PMo <sub>12</sub> O <sub>40</sub>                                                                                                                                       | 1 M HClO <sub>4</sub>                |                             | 120 F g <sup>-1</sup>   | 8                |
| 11 | SWCNT-TBA-PV <sub>2</sub> Mo <sub>10</sub>                                                                                                                                                  | 1 M H <sub>2</sub> SO <sub>4</sub>   | 0.1 A g <sup>-1</sup>       | 444 F g <sup>-1</sup>   | 9                |
| 12 | [Cu <sup>I</sup> (btx)] <sub>4</sub> [SiW <sub>12</sub> O <sub>40</sub> ]                                                                                                                   | 1 M H <sub>2</sub> SO <sub>4</sub>   | 3 A g <sup>-1</sup>         | 110.3 F g <sup>-1</sup> | 10               |
| 13 | AC/PW <sub>12</sub> O <sub>40</sub>                                                                                                                                                         | 1 M H <sub>2</sub> SO <sub>4</sub>   | 10 mV s <sup>-1</sup>       | 254 F g <sup>-1</sup>   | 11               |
| 14 | [Ag <sub>5</sub> (C <sub>2</sub> H <sub>2</sub> N <sub>3</sub> ) <sub>6</sub> ][H <sub>5</sub> SiW <sub>12</sub> O <sub>40</sub> ]                                                          | 0.5 M H <sub>2</sub> SO <sub>4</sub> | 6 A g <sup>-1</sup>         | 29.8 F g <sup>-1</sup>  | 12               |
| 15 | [Ag <sub>5</sub> (C <sub>2</sub> H <sub>2</sub> N <sub>3</sub> ) <sub>6</sub> ][H <sub>5</sub> SiMo <sub>12</sub> O <sub>40</sub> ]                                                         | 0.5 M H <sub>2</sub> SO <sub>4</sub> | 0.5A g <sup>-1</sup>        | 155.0 F g <sup>-1</sup> | 12               |
| 16 | [Ag <sub>5</sub> (C <sub>2</sub> H <sub>2</sub> N <sub>3</sub> ) <sub>6</sub> ][H <sub>5</sub> SiMo <sub>12</sub> O <sub>40</sub> ]@1<br>5%GO-based electrode                               | 0.5 M H <sub>2</sub> SO <sub>4</sub> | 0.5A g <sup>-1</sup>        | 230.2 F g <sup>-1</sup> | 12               |
| 17 | [Cu <sup>I</sup> <sub>4</sub> H <sub>2</sub> (btx) <sub>5</sub> (PMo <sub>12</sub> O <sub>40</sub> ) <sub>2</sub> ]·2H <sub>2</sub> O                                                       | 1 M H <sub>2</sub> SO <sub>4</sub>   | 2 A g <sup>-1</sup>         | 237.0 F g <sup>-1</sup> | 13               |
| 18 | [Cu <sup>I</sup> <sub>4</sub> H <sub>2</sub> (btx) <sub>5</sub> (PW <sub>12</sub> O <sub>40</sub> ) <sub>2</sub> ]·2H <sub>2</sub> O                                                        | 1 M H <sub>2</sub> SO <sub>4</sub>   | 2 A g <sup>-1</sup>         | 100.0 F g <sup>-1</sup> | 13               |
| 19 | RGO/PIL/PMo <sub>12</sub> O <sub>40</sub>                                                                                                                                                   | 0.5 M H <sub>2</sub> SO <sub>4</sub> | 10 mV s <sup>-1</sup>       | 456 F g <sup>-1</sup>   | 14               |
| 20 | HT-RGO-PMo <sub>12</sub> O <sub>40</sub>                                                                                                                                                    | 1 M H <sub>2</sub> SO <sub>4</sub>   | 10 mV s <sup>-1</sup>       | 276 F g <sup>-1</sup>   | 15               |



|    |                                          |                                           |                        |                                                                                                                               |    |
|----|------------------------------------------|-------------------------------------------|------------------------|-------------------------------------------------------------------------------------------------------------------------------|----|
| 21 | AC/PMo <sub>12</sub>                     | 1 M H <sub>2</sub> SO <sub>4</sub>        | 2 A g <sup>-1</sup>    | 160 F g <sup>-1</sup><br>( for the Positive Electrode)<br>and<br>183 F g <sup>-1</sup><br>(for the negative hybrid Electrode) | 16 |
| 22 | AC@PMo <sub>12</sub> O <sub>40</sub>     | 1 M [Bmim] H <sub>2</sub> SO <sub>4</sub> | 1 mV s <sup>-1</sup>   | 223 F g <sup>-1</sup>                                                                                                         | 17 |
| 23 | PC 5-1-PMo <sub>12</sub>                 | 1 M H <sub>2</sub> SO <sub>4</sub>        | 200 mV s <sup>-1</sup> | 361F g <sup>-1</sup>                                                                                                          | 18 |
| 24 | PMo <sub>10</sub> V <sub>2</sub> @ZIF-67 | 3M KOH                                    | 2 A g <sup>-1</sup>    | 475 F g <sup>-1</sup>                                                                                                         | 19 |

**Table S4** Other POMs-based electrode materials

|    | Electrode material                                                                                                                                                   | Electrolyte                                                                                                                                                                                   | Scan rate / Current density | Specific capacitance   | Ref. |
|----|----------------------------------------------------------------------------------------------------------------------------------------------------------------------|-----------------------------------------------------------------------------------------------------------------------------------------------------------------------------------------------|-----------------------------|------------------------|------|
| 1  | (H <sub>2</sub> bpe)(Hbpe) <sub>2</sub> {[Cu(pzta)(H <sub>2</sub> O)[P <sub>2</sub> W <sub>18</sub> O <sub>62</sub> ]} · 5H <sub>2</sub> O                           | 1 M H <sub>2</sub> SO <sub>4</sub>                                                                                                                                                            | 5 A g <sup>-1</sup>         | 168 F g <sup>-1</sup>  | 20   |
| 2  | [{K(H <sub>2</sub> O) <sub>2</sub> }{Cu <sub>2</sub> (biiim) <sub>2</sub> }(P <sub>2</sub> W <sub>18</sub> O <sub>62</sub> )]                                        | 1 M H <sub>2</sub> SO <sub>4</sub>                                                                                                                                                            | 0.2 A g <sup>-1</sup>       | 95.7 F g <sup>-1</sup> | 21   |
| 3  | AC/P <sub>2</sub> Mo <sub>18</sub>                                                                                                                                   | 1 M H <sub>2</sub> SO <sub>4</sub>                                                                                                                                                            | 6 A g <sup>-1</sup>         | 275F g <sup>-1</sup>   | 22   |
| 4  | [Cu <sup>II</sup> <sub>2</sub> (bipy)(H <sub>2</sub> O) <sub>4</sub> (C <sub>6</sub> H <sub>5</sub> PO <sub>3</sub> ) <sub>2</sub> Mo <sub>5</sub> O <sub>15</sub> ] | 0.5 M H <sub>2</sub> SO <sub>4</sub>                                                                                                                                                          | 2 A g <sup>-1</sup>         | 160.9F g <sup>-1</sup> | 23   |
| 5  | {Mo <sub>132</sub> } -rGO                                                                                                                                            | 1 M Li <sub>2</sub> SO <sub>4</sub>                                                                                                                                                           | A g <sup>-1</sup>           | 617.3F g <sup>-1</sup> | 24   |
| 6  | [Cu <sup>I</sup> <sub>2</sub> (bnie) <sub>2</sub> ] <sub>2</sub> (β-Mo <sub>8</sub> O <sub>26</sub> )                                                                | 4.0 M KOH                                                                                                                                                                                     | 1 A g <sup>-1</sup>         | 828F g <sup>-1</sup>   | 25   |
| 7  | [Cu <sup>I</sup> <sub>2</sub> (β-Mo <sub>8</sub> O <sub>26</sub> )(bnie) <sub>2</sub> ][Cu <sub>2</sub> (bnie) <sub>2</sub> ]                                        | 4.0 M KOH                                                                                                                                                                                     | 1 A g <sup>-1</sup>         | 800F g <sup>-1</sup>   | 25   |
| 8  | MoS/rGO                                                                                                                                                              | 0.5 M Na <sub>2</sub> SO <sub>4</sub> + H <sub>2</sub> SO <sub>4</sub>                                                                                                                        | 10 mV s <sup>-1</sup>       | 870 F g <sup>-1</sup>  | 26   |
| 9  | [Ru(bpy) <sub>3</sub> ] <sub>3.33</sub> P <sub>2</sub> Mo <sub>18</sub> O <sub>62</sub> · mH <sub>2</sub> O                                                          | pH=7<br>(0.25 M total salt containing 0.05 M KH <sub>2</sub> PO <sub>4</sub> , 0.05 M K <sub>2</sub> HPO <sub>4</sub> , 0.1 M NaCl, 0.025 M MgCl <sub>2</sub> and 0.025 M CaCl <sub>2</sub> ) | 0.2 A g <sup>-1</sup>       | 125 F g <sup>-1</sup>  | 27   |
| 10 | [Ru(bpy) <sub>3</sub> ] <sub>3</sub> P <sub>2</sub> Mo <sub>18</sub> O <sub>62</sub> · nH <sub>2</sub> O                                                             | —                                                                                                                                                                                             | 0.2 A g <sup>-1</sup>       | 68 F g <sup>-1</sup>   | 27   |

|    |                                                           |                                              |                       |                         |    |
|----|-----------------------------------------------------------|----------------------------------------------|-----------------------|-------------------------|----|
| 11 | Na <sub>6</sub> V <sub>10</sub> O <sub>28</sub>           | 1M LiClO <sub>4</sub> in propylene carbonate | 0.1 A g <sup>-1</sup> | 354 F g <sup>-1</sup>   | 28 |
| 12 | {Ag <sub>6</sub> Mo <sub>7</sub> O <sub>24</sub> }@Ag-MOF | 1 M Na <sub>2</sub> SO <sub>4</sub>          | 1 A g <sup>-1</sup>   | 320.8 F g <sup>-1</sup> | 29 |
| 13 | Ni(OH) <sub>2</sub> -POV thin films (LNHV-1)              | 2 M KOH                                      | 1 A g <sup>-1</sup>   | 1440 F g <sup>-1</sup>  | 30 |
| 14 | LNHV-2.5                                                  | 2 M KOH                                      | 1 A g <sup>-1</sup>   | 637 F g <sup>-1</sup>   | 30 |
| 15 | LNHV-3                                                    | 2 M KOH                                      | 1 A g <sup>-1</sup>   | 536 F g <sup>-1</sup>   | 30 |

## Reference

- (1) Z. Liu, W. Yao, H. Gan, C. Sun, Z. Su and X. Wang, *Chem. Eur. J.*, 2019, **25**, 16617–16624. DOI:10.1002/chem.201903664
- (2) A. Ensafi, E. Heydari Soureshjani and B. Rezaei, *Chem. Eng. J.*, 2017, **330**, 1109–1118. DOI: 10.1016/j.cej.2017.08.062
- (3) G. Wang, T. Chen, X. Wang, H. Ma and H. Pang, *Eur. J. Inorg. Chem.*, 2017, **45**, 5350–5355. DOI: 10.1002/ejic.201701031
- (4) L. Lu, Y. Xie, *New J. Chem.*, 2017, **41**, 335–346. DOI:10.1039/C6NJ02368A
- (5) S. Roy, V. Vemuri, S. Maiti, K. Manoj, *Inorg. Chem.*, 2018, **57**, 12078–12092. DOI: 10.1021/acs.inorgchem.8b01631
- (6) D. Chai, J. Xin, B. Li, H. Pang, H. Ma, K. Li, B. Xiao, X. Wang and L. Tan, *Dalton Trans.*, 2019, **48**, 13026–13033. DOI: 10.1039/C9DT02420D
- (7) R. Li, C. He, L. Cheng, G. Lin, G. Wang, D. Shi, R. Kowk Yiulic and Y. Yang, *Composites Part B: Engineering*, 2017, **121**, 75–82. DOI:10.1016/j.compositesb.2017.03.026
- (8) A. Cuentas Gallegos, M. Lira Cantú, N. Casañ Pastor and P. Gómez Romero, *Adv. Funct. Mater.*, 2005, **15**, 1125–1133. DOI:https://doi.org/10.1002/adfm.200400326
- (9) H. Chen, R. Oweini, J. Friedl, C. Lee, L. Li, U. Kortz, *Nanoscale*, 2015, **7**, 7934–7941. DOI:10.1039/c4nr07528e
- (10) D. Chai, Y. Hou, K. O'Halloran, H. Pang, H. Ma, G. Wang and X. Wang, *Chem Electro Chem*, 2018, **5**, 3443–3450. DOI: 10.1002/celec.201801081
- (11) J. Guevar, V. Ruiz and P. Romero, *J. Mater. Chem. A*, 2014, **2**, 1014–102. DOI:10.1039/c3ta14455k
- (12) Y. Hou, D. Chai, B. Li, H. Pang, H. Ma, X. Wang and L. Tan, *ACS Appl. Mater. Interfaces*, 2019, **11**, 20845–20853. DOI: 10.1021/acsami.9b04649
- (13) D. Chai, C. Gómez García, B. Li, H. Pang, H. Ma, X. Wang and L. Tan, *Chem Eng J*, 2019, **373**, 587–597. DOI:10.1016/j.cej.2019.05.084
- (14) M. Yang, B. Choi, S. Jung, Y. Han, Y. Huh and S. Lee, *Adv. Funct. Mater.*, 2014, **24**, 7301–7309. DOI:10.1002/adfm.201401798
- (15) J. Guevara, V. Ruiza, and P. Romero, *Phys. Chem. Chem. Phys.*, 2014, **16**, 20411–20414. DOI:10.1039/C4CP03321C

- (16) V. Ruiz, J. Guevara and P. Romero, *Electrochem Commun*, 2012, **24**, 35–38. DOI:10.1016/j.elecom.2012.08.003
- (17) C. Hu, E. Zhao, N. Nitta, A. Magasinski, G. Berdichevsky and G. Yushin, *J. Power Source*, 2016, **326**, 569–574. DOI:10.1016/j.jpowsour.2016.04.036
- (18) M. Genovese, K. Lian, *J. Mater. Chem. A.*, 2017, **5**, 3939–3947. DOI:10.1039/C6TA10382K
- (19) A. Mohamed, M. Ramadan, N. Ahmed, A. Abo. ElNaga, H. Alalawy, T. Zaki, S. Shaban, H. Hassan and N. Allam, *J. Energy Storage*, 2020, **28**, 101292. DOI:10.1016/j.est.2020.101292
- (20) G. Wang, T. Chen, S. Li, H. Pang and H. Ma, *Dalton Trans.*, 2017, **46**, 13897–13902. DOI:10.1039/C7DT02230A
- (21) J. Gao, L. Gong, X. Fan, K. Yu, Z. Zheng and B. Zhou, *ACS Appl. Nano Mater.*, 2020, **3**, 1497–1507. DOI: 10.1021/acsanm.9b02312
- (22) A. Mu, J. Li, W. Chen, X. Sang, Z. Su, E. Wang, *Inorg. Chem. Commun.*, 2015, **46**, 149–152. DOI: 10.1016/j.inoche.2015.03.032
- (23) B. R. Lu, S. B. Li, J. Pan, L. Zhang, J. J. Xin, Y. Chen and X. G. Tan, *Inorg. Chem.*, 2020, **59**, 1702–1714. DOI:10.1021/acs.inorgchem.9b02858
- (24) Y. Dong, L. Chen, W. Chen, X. Zheng, X. Wang and E. Wang, *Chem Asian J.*, 2018, **13**, 3304–3313. DOI: 10.1002/asia.201801018
- (25) K. Wang, Z. Wang, S. Wang, Y. Chu, R. Xi, X. Zhang and H. Wu, *Chem. Eng. J.*, 2019, **367**, 239–248. DOI:10.1016/j.cej.2019.02.145
- (26) S. Zhang, R. Liu, S. Li, A. Dolbecq, P. Mialane, L. Suo, L. Bi, B. Zhang, T. Liu, C. Wu, L. Yan, Z. Su, G. Zhang and B. Keita, *J. Colloid Interf. Sci.*, 2018, **514**, 507–516. DOI:10.1016/j.jcis.2017.12.039
- (27) S. Chinnathambi, M. Ammam, *J. Power Sources*, 2015, **284**, 524–535. DOI:10.1016/j.jpowsour.2015.03.034
- (28) H. Chen, G. Wee, R. Al Oweini, J. Friedl, K. Tan, Y. Wang, C. Wong, *ChemPhysChem*, 2014, **15**, 2162–2169. DOI:10.1002/cphc.201400091
- (29) X. Zhao, L. Gong, C. Wang, C. Wang, K. Yu and B. Zhou, *Chem. Eur. J.*, 2020, **26**, 4613–4619. DOI:10.1002/chem.201905689
- (30) J. Gunjekar, A. Inamdar, B. Hou, S. Cha, S. Pawar, A. Abu Talha, H. Chavan, J. Kim, S. Cho, S. Lee, Y. Jo, H. Kim and H. Im, *Nanoscale*, 2018, **10**, 8953–8961. DOI: 10.1039/c7nr09626g
